# Supplementary material for: Ocean acidification changes the structure of an Antarctic coastal protistan community
Source: Copernicus journal article supplement (doi:10.5194/bg-15-2393-2018), 2018-04-20
Supplement: Supplementary file 1 [file bg-15-2393-2018-supplement.pdf]

Supplement of Biogeosciences, 15, 2393–2410, 2018  
<https://doi.org/10.5194/bg-15-2393-2018-supplement>  
© Author(s) 2018. This work is distributed under  
the Creative Commons Attribution 3.0 License.

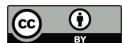

*Supplement of*

## **Ocean acidification changes the structure of an Antarctic coastal protistan community**

**Alyce M. Hancock et al.**

*Correspondence to:* Alyce M. Hancock ([alyce.hancock@utas.edu.au](mailto:alyce.hancock@utas.edu.au))

The copyright of individual parts of the supplement might differ from the CC BY 3.0 License.

**Table S1.** Measurements of seawater conditions at time of sampling from Prydz Bay, East Antarctica (19th November 2014). Data are mean  $\pm$  one standard deviation of all six minicosm measurements.

| <b>Condition</b>                   | <b>Value</b>     |
|------------------------------------|------------------|
| $f\text{CO}_2$ ( $\mu\text{atm}$ ) | $356 \pm 6$      |
| $\text{pH}_T$                      | $8.08 \pm 0$     |
| DIC ( $\mu\text{mol kg}^{-1}$ )    | $2187 \pm 6$     |
| PA ( $\mu\text{mol kg}^{-1}$ )     | $2317 \pm 6$     |
| Temperature ( $^\circ\text{C}$ )   | $-1.03 \pm 0.17$ |
| $\text{NO}_x$ ( $\mu\text{M}$ )    | $26.19 \pm 0.74$ |
| Phosphorus ( $\mu\text{M}$ )       | $1.74 \pm 0.02$  |
| Silicate ( $\mu\text{M}$ )         | $60.75 \pm 0.91$ |

**Table S2.** Mean carbonate chemistry speciation of  $\text{pH}_T$  and DIC (measured) and  $f\text{CO}_2$  and practical alkalinity (PA, calculated) for each minicosm tank after acclimation (days 8 to 18). Data are mean  $\pm$  one standard deviation of day 8 to 18 measurements in each minicosm.

| <b>Minicosm</b> | <b><math>\text{pH}_T</math></b> | <b>DIC</b><br>( $\mu\text{mol kg}^{-1}$ ) | <b><math>f\text{CO}_2</math></b><br>( $\mu\text{atm}$ ) | <b>PA</b><br>( $\mu\text{mol kg}^{-1}$ ) |
|-----------------|---------------------------------|-------------------------------------------|---------------------------------------------------------|------------------------------------------|
| 1               | $8.10 \pm 0.04$                 | $2188 \pm 6$                              | $343 \pm 30$                                            | $2324 \pm 11$                            |
| 2               | $7.94 \pm 0.03$                 | $2243 \pm 8$                              | $506 \pm 43$                                            | $2325 \pm 10$                            |
| 3               | $7.85 \pm 0.04$                 | $2270 \pm 5$                              | $634 \pm 63$                                            | $2325 \pm 12$                            |
| 4               | $7.69 \pm 0.07$                 | $2314 \pm 11$                             | $953 \pm 148$                                           | $2321 \pm 11$                            |
| 5               | $7.61 \pm 0.04$                 | $2337 \pm 5$                              | $1140 \pm 112$                                          | $2320 \pm 10$                            |
| 6               | $7.45 \pm 0.04$                 | $2377 \pm 8$                              | $1641 \pm 140$                                          | $2312 \pm 10$                            |

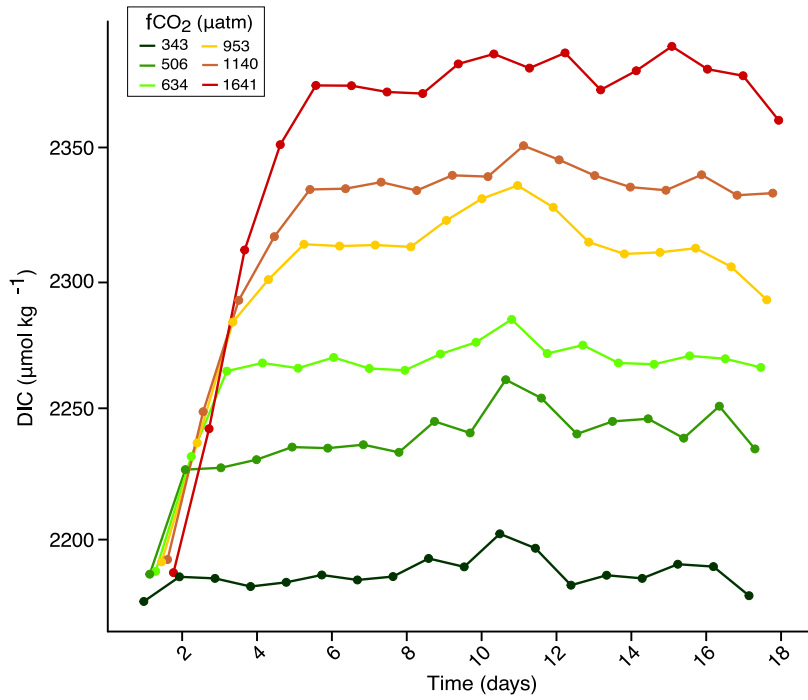

**Figure S1.** Temporal development of DIC within each minicosm throughout the experimental period.

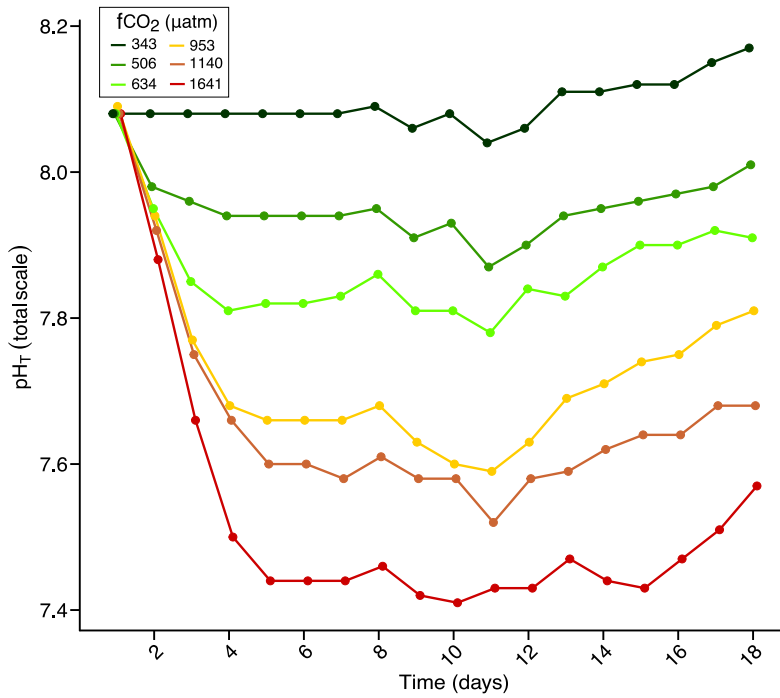

**Figure S2.** Temporal development of  $\text{pH}_T$  (total scale) within each minicosm throughout the experimental period.

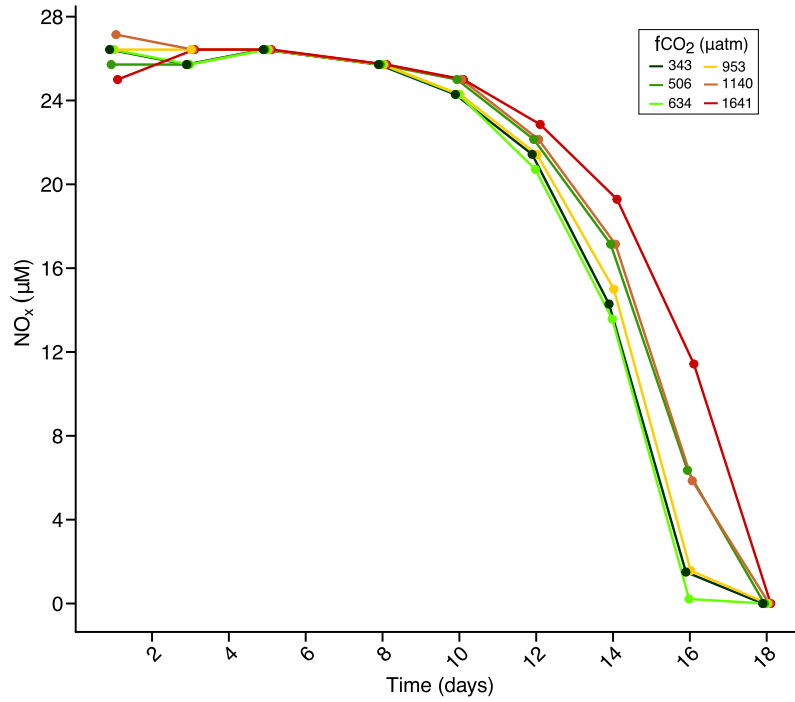

**Figure S3.** Nitrate/nitrite ( $\text{NO}_x$ ) concentrations within each minicosm throughout the experimental period.

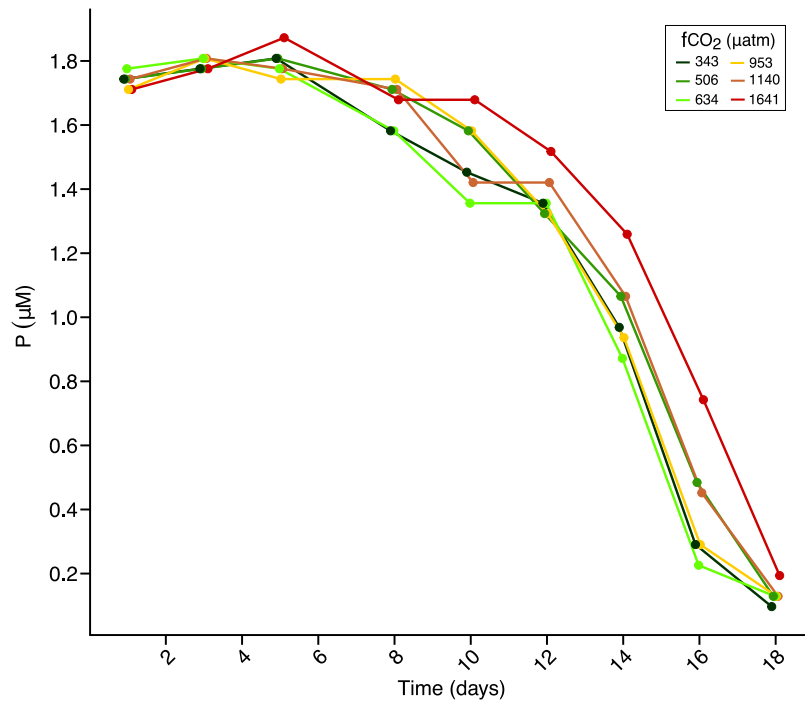

**Figure S4.** Dissolved reactive phosphorus ( $\text{P}$ ) concentrations within each minicosm throughout the experimental period.

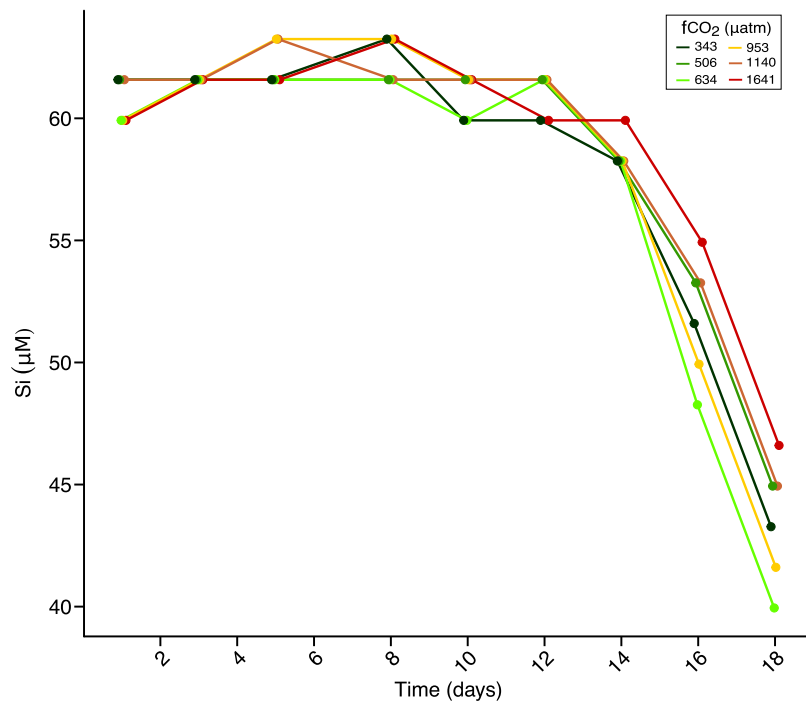

**Figure S5.** Molybdate reactive silica (Si) concentrations within each minicosm throughout the experimental period.
